# Supplementary material
Source: PubMed Central journal article supplement (PMC3915215)

## Supplementary figures

**Figure S1.** Daily body weight gain before (0 h) and 72 h after siRNA injection (siCtrl, n = 21; siCx43, n = 19). Repeated measures Two-way ANOVA followed by a Bonferroni post-hoc test, \* p < 0.05.

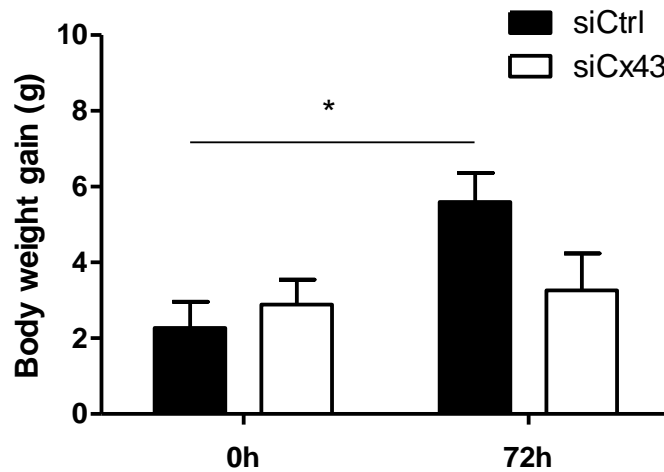

**Figure S2.** Glycemia and insulinemia 72h after siRNA injection (n = 5). Unpaired t-tests have been performed.

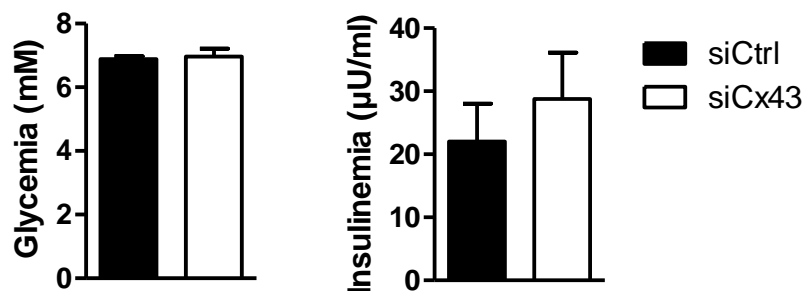

Supplement: jcbfm2013206x1.pdf [file jcbfm2013206x1.pdf]
